# Supplementary material for: Two magnon scattering and anti-damping behavior in a two-dimensional epitaxial TiN/Py(tPy)/β-Ta(tTa) system
Source: Royal Society of Chemistry journal article supplement (doi:10.1039/c6ra25980d), 2017-01-01
Supplement: c6ra25980d1.pdf [file c6ra25980d1.pdf]

1 **Supplemental Information for**

2 **Two magnon scattering and anti-damping behavior in two-dimensional**  
3 ***epitaxial* TiN/Py( $t_{Py}$ )/ $\beta$ -Ta( $t_{Ta}$ ) system**

4 Nilamani Behera<sup>a</sup> Ankit Kumar<sup>a,b</sup> Sujeet Chaudhary<sup>a\*</sup> and Dinesh K. Pandya<sup>a</sup>

5 <sup>a</sup>*Thin Film Laboratory, Department of Physics, Indian Institute of Technology Delhi,*

6 *New Delhi 110016, India*

7 <sup>b</sup>*Department of Engineering Sciences, Box 516, Uppsala University, 751 21 Uppsala, Sweden*

8 **Following supporting data/information is supplied through this additional file:**

9 **1. RHEED analysis of *epitaxial* Si/TiN(8 nm)/Py (3, 5, and 10 nm)**

10 **2. Details of fitting parameters used in Fig. 3(b) and Fig. 3(d)**

11 **3. Comparison of geometrical factor “S” as obtained from  $\Delta H$ -vs.- $t_{Py}$  and  $\Delta H$ -vs.- $1/t_{Py}^2$  plot**

12 **4. *In-plane*  $f$ -vs.- $H_r$ - and  $\Delta H$ -vs.- $f$  of *epitaxial* bilayers: Si/TiN(8 nm)/Py(12 nm)/  $\beta$ -Ta(1.5, 4,**  
13 **5, 7.5, 10.5 nm)**

14 **5. Thickness dependence of effective magnetization in Si/TiN(8 nm)/Py( $t_{Py}$  nm) and**  
15 **Si/TiN(8 nm)/Py(12 nm)/ $\beta$ -Ta ( $t_{Ta}$ ) bilayers**

16 **6.  $1/t_{Py}$  dependence of effective damping  $\alpha_{eff}(t_{Py})$  i.e.  $\alpha_{eff}(t_{Py})$ -vs.- $1/t_{Py}$  in Si/TiN(8 nm)/Py( $t_{Py}$ ,**  
17 **nm) system**

18 **7. Surface topography (RMS roughness) studies in Si/TiN(8 nm)/Py( $t_{Py}$  nm) and Si/TiN(8**  
19 **nm)/Py(12 nm)/ $\beta$ -Ta ( $t_{Ta}$ ) system by atomic force microscopy (AFM)**

20 These are briefly described in the following.

21 **1. RHEED analysis of *epitaxial* Si/TiN(8 nm)/Py (3, 5, and 10 nm)**

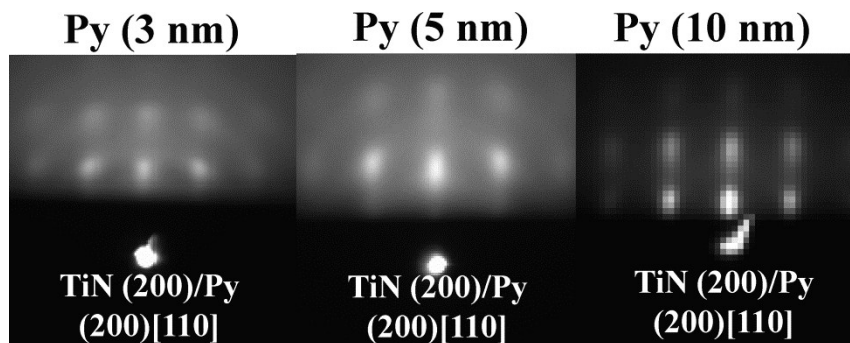

1 Fig. SI 1 RHEED patterns of Py 3 nm, 5 nm, and 10 nm samples grown on TiN(200) [001]. The  
 2 epitaxial relationship between Py and the TiN buffer layer is TiN(200)//Py(200);  
 3 Py[001]//TiN[001].

4 RHEED patterns clearly indicate that the growth of Py films of thickness less than 12 nm  
 5 is 3D island type as compared to 2-D growth at higher thicknesses, already shown in Fig. 1 of  
 6 MS.

## 7 2. Details of fitting parameters used in Fig. 3(b) and Fig. 3(d)

8 **I.** Table-1 presents the fitting parameters, the renormalization factor  $r$  and  $\frac{2K_S}{M_s}$ , that are used  
 9 to fit the data of Fig. 3(b) by using eqn (4) as thickness dependent shift of  $H_r$ . Here we have  
 10 taken  $4\pi M_s = 1088$  mT as it obtained from the fitting of  $4\pi M_{eff}$ -vs.- $t_{Py}$  for all bare Si/TiN(8  
 11 nm)/Py ( $t_{Py}=3-20$  nm), i.e. bare *epi*-Py samples shown in Fig. SI 3(a).

12 **II.** Table-2 shows the list of fitting parameters that are used to fit the data in Fig. 3(d) by using  
 13 the eqn (6) within the error of measurement, the value of geometrical factor “ $S$ ” which  
 14 arises from surface roughness and defects is almost of same order of magnitude as reported  
 15 by Arias and Mills theory.<sup>30</sup> It can be seen that “ $S$ ” varies in the range from 0.047 to 0.144  
 16 nm<sup>2</sup> for all the thicknesses of  $t_{Py}$  at all the investigated frequencies (6-10 GHz),  $\alpha$  remains  
 17 constant within the error of measurement.

18 **Table-1: Fitting parameters obtained using eqn (4) for  $H_r$ -vs.- $t_{Py}$  data of Fig. 3(b).**

| Fitting parameters         | Frequency (GHz)                 |                                 |                                 |                                 |                                 |
|----------------------------|---------------------------------|---------------------------------|---------------------------------|---------------------------------|---------------------------------|
|                            | 6                               | 7                               | 8                               | 9                               | 10                              |
| $r$ (mT <sup>-1</sup> )    | $-8.85(\pm 0.90)\times 10^{-5}$ | $-1.27(\pm 0.14)\times 10^{-4}$ | $-1.65(\pm 0.06)\times 10^{-4}$ | $-1.88(\pm 0.05)\times 10^{-4}$ | $-2.16(\pm 0.46)\times 10^{-4}$ |
| $\frac{2K_S}{M_s}$ (mT.nm) | $-1.33(\pm 0.30)\times 10^3$    | $-1.53(\pm 0.31)\times 10^3$    | $-1.68(\pm 0.34)\times 10^3$    | $-1.65(\pm 0.20)\times 10^3$    | $-1.65(\pm 0.21)\times 10^3$    |

19

20 **Table-2: Fitting parameters obtained using Eq. (6) for  $\Delta H$ -vs.- $t_{Py}$  data of Fig. 3(d).**

| Fitting parameters     | Frequency (GHz)                        |                                      |                                        |                                       |                                        |
|------------------------|----------------------------------------|--------------------------------------|----------------------------------------|---------------------------------------|----------------------------------------|
|                        | 6                                      | 7                                    | 8                                      | 9                                     | 10                                     |
| $S$ (nm <sup>2</sup> ) | $0.100 (\pm 0.003) - 0.144(\pm 0.005)$ | $0.073(\pm 0.002)- 0.107(\pm 0.003)$ | $0.048 (\pm 0.002)- 0.073 (\pm 0.003)$ | $0.057(\pm 0.002)- 0.086 (\pm 0.003)$ | $0.053 (\pm 0.003)- 0.077 (\pm 0.004)$ |
| $\alpha_{int}$         | $0.0082 (\pm 0.0002)$                  | $0.0083 (\pm 0.0002)$                | $0.0083(\pm 0.0002)$                   | $0.0083 (\pm 0.0002)$                 | $0.0083 (\pm 0.0002)$                  |

21 **3. Comparison of geometrical factor “ $S$ ” as obtained from  $\Delta H$ -vs.- $t_{Py}$  and  $\Delta H$ -vs.- $1/t_{Py}^2$  plot**

1 We have plotted the  $1/t_{Py}^2$  dependence of  $\Delta H$  i.e.  $\Delta H$ -vs.- $1/t_{Py}^2$  and solid lines are fitted  
 2 with equation (6). The  $\Delta H$ -vs.- $1/t_{Py}^2$  dependency is compared with  $\Delta H$ -vs.- $t_{Py}$  dependency in Fig.  
 3 SI2. In all the cases, the  $S$  values are almost same with previous values within the error of  
 4 measurement as determined by using eqn (6), (See Table 2). For further clarity, the calculated  
 5 values of  $S$  parameters as determined from the  $\Delta H$ -vs.- $t_{Py}$  fit and  $\Delta H$ -vs.- $1/t_{Py}^2$  are shown in Fig.  
 6 SI3

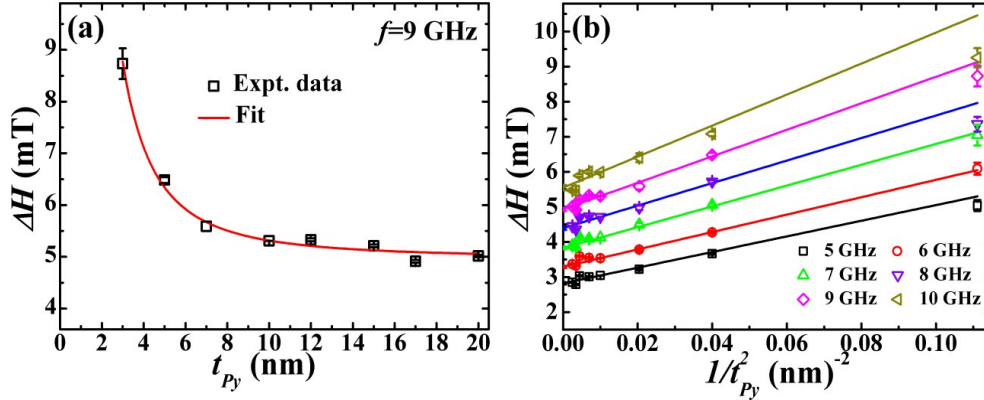

13 Fig. SI 2: (a)  $\Delta H$ -vs.- $t_{Py}$  at 9 GHz and (b)  $\Delta H$ -vs.- $1/t_{Py}^2$  at 5-10 GHz, for Si/TiN(8 nm)/Py( $t_{Py}$ =3-  
 14 20 nm) multilayer thin films. Open symbols are experimental data and solid lines are  
 15 fit to experimental data by using eqn (6).

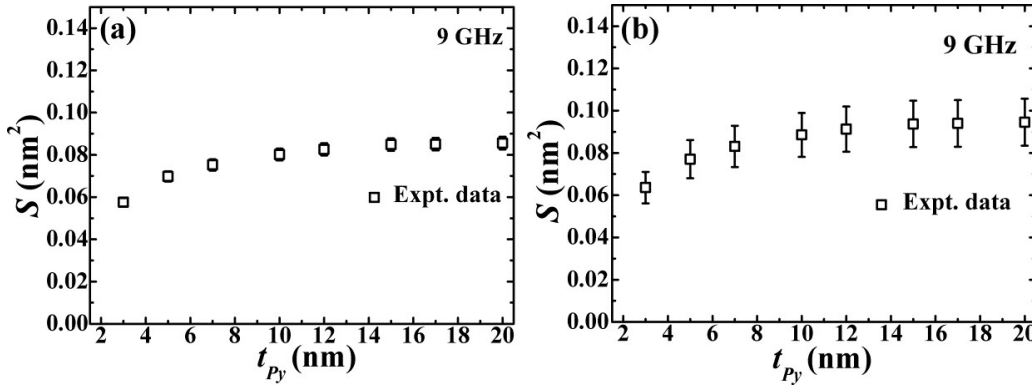

16  
 17  
 18  
 19  
 20  
 21  
 22  
 23 Fig. SI 3:  $S$ -vs.- $t_{Py}$  plots (a) calculated from  $\Delta H$ -vs.- $t_{Py}$  fit and (b)  $\Delta H$ -vs.- $1/t_{Py}^2$  for Si/TiN(8  
 24 nm)/Py( $t_{Py}$ =3-20 nm) multilayer thin films at 9 GHz. Open symbols are experimental  
 25 data.

26 **4. In-plane  $f$ -vs.- $H_r$ - and  $\Delta H$ -vs.- $f$  of epitaxial bilayers: Si/TiN(8 nm)/Py(12 nm)/  $\beta$ -Ta(1.5, 4,  
 27 5, 7.5, 10.5 nm)**

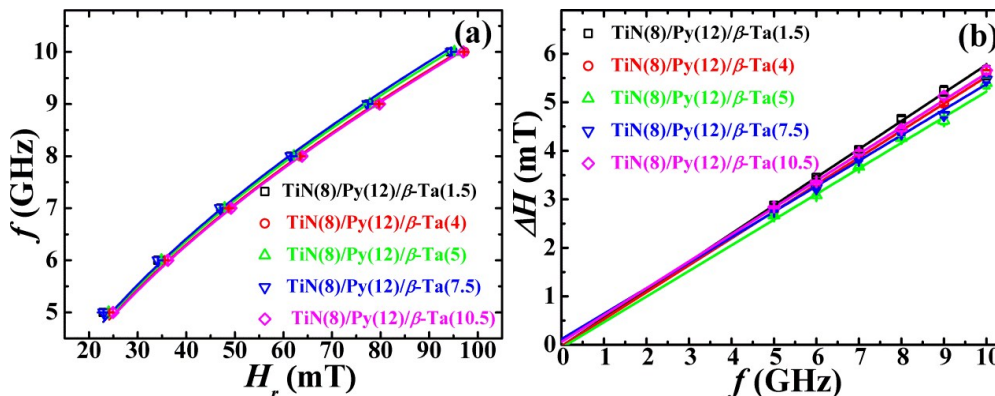

28  
 29  
 30

1

2

3

4 Fig. SI 4: (a) The *in-plane* resonance frequency ( $f$ ) vs. resonance field ( $H_r$ ) and (b)  $\Delta H$ -vs.- $f$   
 5 for samples with different  $t_{Ta}$  and solid lines shows the fits employing eqn (2) and eqn  
 6 (5) respectively.

7 **5. Thickness dependence of effective magnetization in Si/TiN(8 nm)/Py( $t_{Py}$  nm) and**  
 8 **Si/TiN(8 nm)/Py(12 nm)/ $\beta$ -Ta ( $t_{Ta}$ ) bilayers**

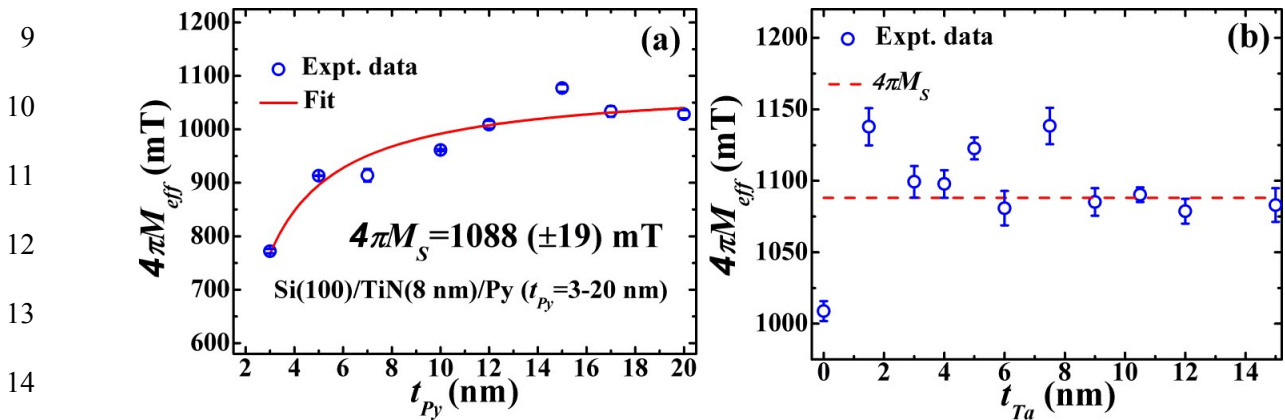

15 Fig. SI 5: Variation of effective magnetization,  $4\pi M_{eff}$  in (a) Si/TiN(8 nm)/Py( $t_{Py}$  nm), and (b)  
 16 Si/TiN(8 nm)/Py(12 nm)/ $\beta$ -Ta ( $t_{Ta}$ ).bilayers obtained from the fittings of eqn (2).  
 17 Symbols are the experimental data within error of measurement and solid line is fit to  
 18 data. Dashed line gives the  $4\pi M_S$  value for *epi*-Py layer.

19 **6.  $1/t_{Py}$  dependence of effective damping  $\alpha_{eff}(t_{Py})$  i.e.  $\alpha_{eff}(t_{Py})$ -vs.- $1/t_{Py}$  in Si/TiN(8 nm)/Py( $t_{Py}$**   
 20 **nm) system.**

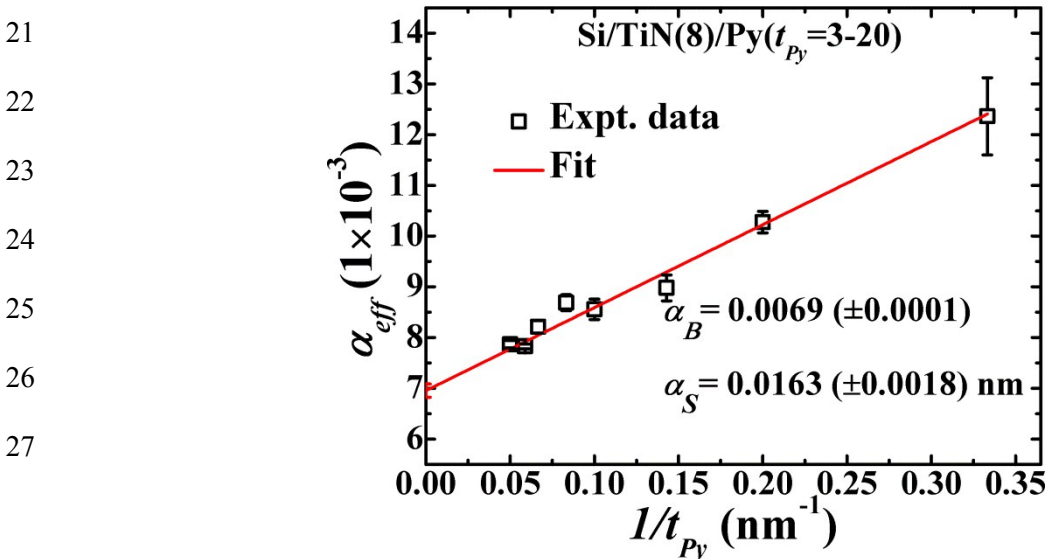

1

2 Fig. SI 6:  $\alpha_{eff}(t_{Py})$ -vs.- $1/t_{Py}$  plots for Si/TiN(8 nm)/Py( $t_{Py}$ =3-20 nm) Open symbols are  
3 experimental data and the solid line is linear fit to experimental data for extracting the  
4 bulk and surface contributions to the overall damping.

5 **7. Surface topography (RMS roughness) studies in Si/TiN(8 nm)/Py( $t_{Py}$  nm) and Si/TiN(8  
6 nm)/Py(12 nm)/ $\beta$ -Ta ( $t_{Ta}$ ) system by atomic force microscopy (AFM)**

7 The estimated values of RMS roughness are 0.86 0.70 nm and 0.33 nm for  
8 Si/TiN(8)/Py(12)/Ta(1.5, 5, 6 nm) samples, and 1.22 nm, 0.44, and 0.69 nm for Si/TiN(8)/Py(7,  
9 10, 12 nm) samples within the error of 1%, respectively as shown in Fig. SI 6.

10

11

12

13

14

15

16

17

18

19

20

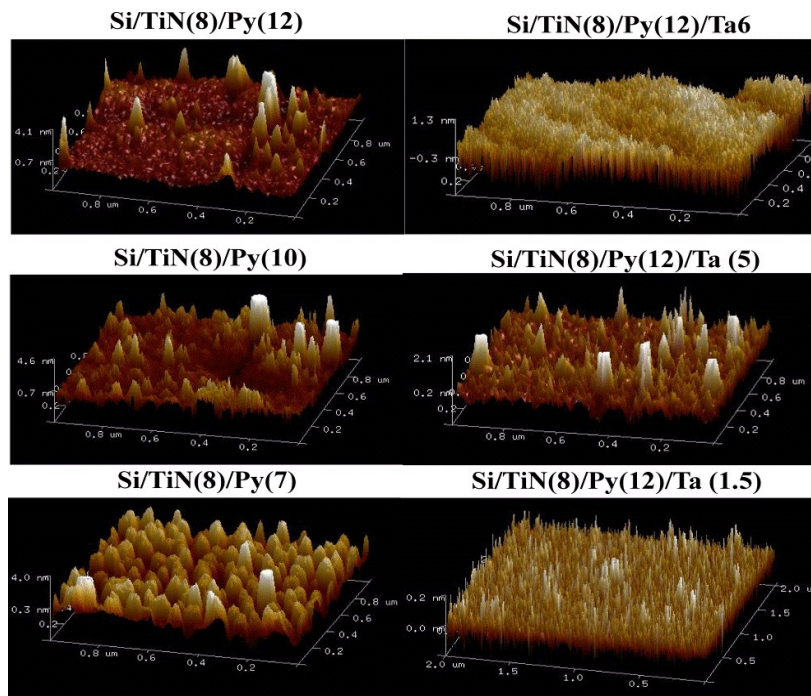

21 Fig. SI 7: Atomic force microscopy (AFM) images of Si/TiN(8 nm)/Py( $t_{Py}$ =7, 10, 12 nm) and  
22 Si/TiN(8 nm)/Py(12)/Ta( $t_{Ta}$ =1.5, 5, 6 nm) samples showing their surface topography.
